# Supplementary material
Source: PubMed Central journal article supplement (PMC7323995)
Supplement: NIHMS1599319-supplement-1.pdf [file NIHMS1599319-supplement-1.pdf]

694 **Supplemental Material**

695 **Exposure Measurement Error in Air Pollution Studies: The Impact of Shared, Multiplicative**  
696 **Measurement Error on Epidemiological Health Risk Estimates**

697  
698 Mariam S. Girguis<sup>a</sup>, Lianfa Li<sup>a</sup>, Fred Lurmann<sup>b</sup>, Jun Wu<sup>c</sup>, Carrie Breton<sup>a</sup>, Frank Gilliland<sup>a</sup>, Daniel Stram<sup>d</sup>,  
699 Rima Habre<sup>a</sup>

700  
701 <sup>a</sup>Division of Environmental Health, Department of Preventive Medicine, Keck School of Medicine,  
702 University of Southern California, Los Angeles, CA, USA

703 <sup>b</sup>Sonoma Technology, Inc, Petaluma, CA, USA

704 <sup>c</sup>Program in Public Health, Susan and Henry Samueli College of Health Sciences, University of California,  
705 Irvine, CA, USA

706 <sup>d</sup>Division of Biostatistics, Department of Preventive Medicine, Keck School of Medicine, University of  
707 Southern California, Los Angeles, CA, USA

708

709 *Corresponding Author*

710 Mariam Girguis, PhD, Division of Environmental Health, University of Southern California Keck School of  
711 Medicine, SSB 230 2001 N. Soto Street, Suite 102, Los Angeles, CA 90089, Phone +1 (323) 442-2795, E-  
712 mail [mgirguis@usc.edu](mailto:mgirguis@usc.edu)

713

714 **Contents**

715 **Figure S1: NO<sub>x</sub> exposure estimates across 120 ensembles for a subset of 50 predictions.....25**

716

717 **Figure S2: Demonstrative effect of increasing SMME on the p-value of epidemiological findings using**  
718 **beta estimates using the stage 2 and stage 3 NO<sub>x</sub> estimates .....26**

719

720

721

722

723

724

725

726

727

728

729

730

731 Figure S1:  $\text{NO}_x$  exposure estimates across 120 ensembles for a subset of 50 predictions. Each line  
732 represents the ensemble estimate is for a randomly chosen subset of predictions (2 week interval).  
733 This figure highlights the variation of possible exposure predictions depending on the specification  
734 of the model used for prediction.

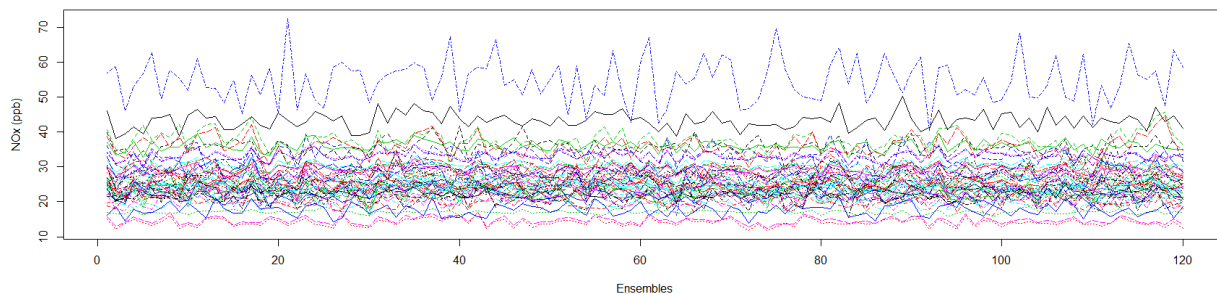

735  
736  
737  
738  
739  
740  
741  
742  
743  
744  
745  
746  
747  
748  
749  
750  
751  
752

753 Figure S2. **Demonstrative effect of increasing SMME on the p-value of epidemiological findings**  
 754 **using beta estimates using the stage 2 and stage 3 NO<sub>x</sub> estimates. Stage 2 estimates (black line)**  
 755 **remained insignificant with increasing SMME values. Stage 3 estimates (blue line) became**  
 756 **insignificant when SMME reaches a value of 0.25. This value much larger in magnitude than our**  
 757 **calculated SMME values. Findings were similar when using a linear model. P value were calculated**  
 758 **using a Wald-like test, that accounted for SMME (eq. S1). Variance estimates were held constant for**  
 759 **this image.**

760 
$$W = \hat{b} / (SE(b)^2 + b^2 \sigma_{SM}^2). \quad (S1)$$

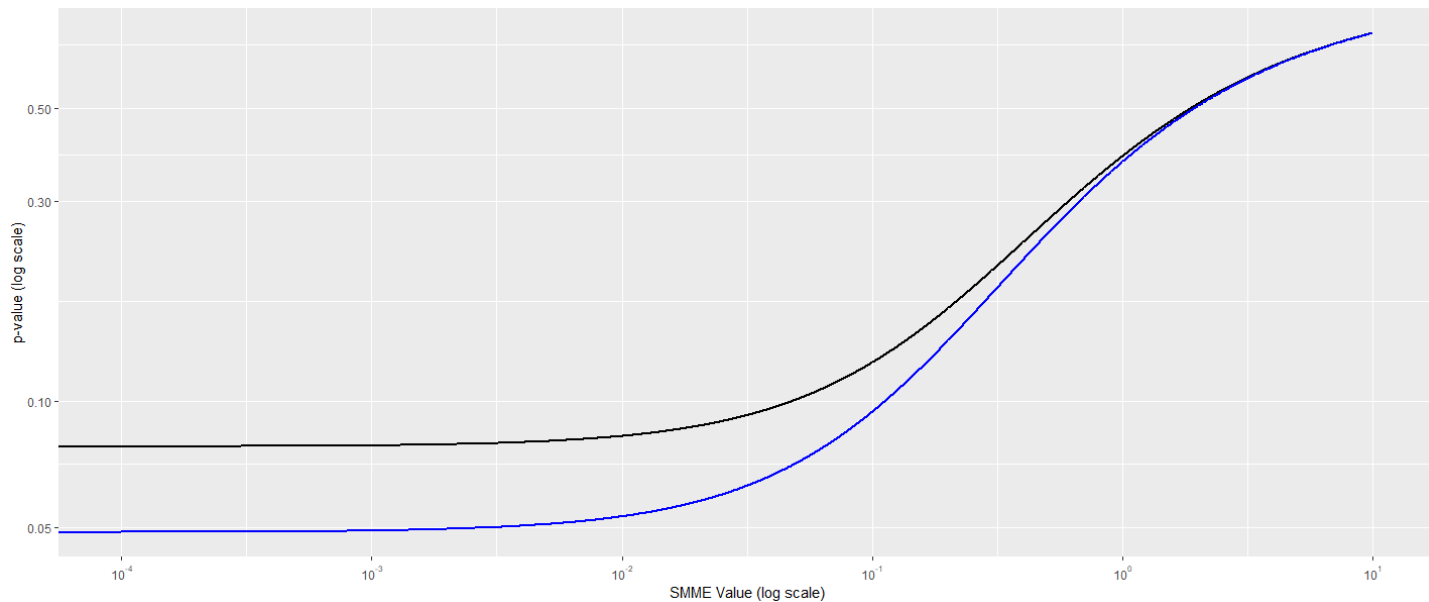

761

762

763
